# Supplementary material for: Effect of Soaking, Germination, and Roasting on Phenolic Composition, Antioxidant Activities, and Fatty Acid Profile of Sunflower (Helianthus annuus L.) Seeds
Source: MDPI journal article supplement (doi:10.3390/horticulturae10040387), 2024-04-11
Supplement: s1 [file s1]

**Table S1.** Moisture content (%) of sunflower seeds.

| Fractions | Moisture content (%) |                |
|-----------|----------------------|----------------|
|           | Striped seed         | Black oil seed |
| Raw       | 3.43±0.01            | 3.42±0.01      |
| S2        | 24.52±0.12           | 24.46±0.12     |
| S12       | 29.03±0.24           | 29.03±0.25     |
| S24       | 28.59±0.07           | 28.53±0.07     |
| G24       | 29.24±0.04           | 29.23±0.04     |
| G48       | 42.86±0.06           | 42.86±0.06     |
| R5        | 1.62±0.04            | 1.75±0.08      |
| R6        | 1.31±0.17            | 1.90±0.11      |
| R7        | 1.60±0.02            | 1.33±0.09      |

Values are expressed as mean ± SD (n = 3) of triplicate measurement. S2, soaked 2 hours; S12, soaked 12 hours; S24, soaked 24 hours; G24, germinated at 24 hours; G48, germinated at 48 hours; R5, roasted at 5 minutes; R6, roasted at 6 minutes; R7, roasted at 7 minutes.

**Table S2.** Fatty acid composition (% total fatty acids) of raw and processed black oil seeds.

| Fractions | Fatty acid composition (%) |                        |                          |                          |                        |                         |                          |                          | Total |
|-----------|----------------------------|------------------------|--------------------------|--------------------------|------------------------|-------------------------|--------------------------|--------------------------|-------|
|           | 16:0                       | 18:0                   | 18:1                     | 18:2                     | 18:3                   | ΣSFA                    | ΣMUFA                    | ΣPUFA                    |       |
| Raw       | 6.08±0.03 <sup>b</sup>     | 3.11±0.04 <sup>b</sup> | 32.53±0.36 <sup>ab</sup> | 56.57±0.31 <sup>de</sup> | 1.75±0.06 <sup>a</sup> | 9.15±0.01 <sup>bc</sup> | 32.53±0.36 <sup>ab</sup> | 58.33±0.35 <sup>b</sup>  | 100   |
| S2        | 5.86±0.14 <sup>cd</sup>    | 2.91±0.06 <sup>c</sup> | 33.06±0.34 <sup>a</sup>  | 56.87±0.54 <sup>d</sup>  | 1.30±0.03 <sup>e</sup> | 8.77±0.20 <sup>ef</sup> | 33.06±0.34 <sup>a</sup>  | 58.17±0.51 <sup>bc</sup> | 100   |
| S12       | 6.00±0.03 <sup>bc</sup>    | 2.90±0.01 <sup>c</sup> | 32.52±0.18 <sup>ab</sup> | 57.34±0.20 <sup>cd</sup> | 1.24±0.02 <sup>f</sup> | 8.90±0.03 <sup>de</sup> | 32.52±0.18 <sup>ab</sup> | 58.58±0.21 <sup>b</sup>  | 100   |
| S24       | 6.44±0.17 <sup>a</sup>     | 3.05±0.01 <sup>b</sup> | 32.98±0.25 <sup>a</sup>  | 55.90±0.15 <sup>e</sup>  | 1.63±0.02 <sup>b</sup> | 9.49±0.18 <sup>a</sup>  | 32.98±0.25 <sup>a</sup>  | 57.53±0.15 <sup>c</sup>  | 100   |
| G24       | 5.84±0.12 <sup>cd</sup>    | 2.88±0.03 <sup>c</sup> | 31.78±0.06 <sup>c</sup>  | 57.95±0.17 <sup>bc</sup> | 1.54±0.04 <sup>c</sup> | 8.73±0.14 <sup>ef</sup> | 31.78±0.06 <sup>c</sup>  | 59.49±0.13 <sup>a</sup>  | 100   |
| G48       | 5.73±0.03 <sup>d</sup>     | 2.84±0.04 <sup>c</sup> | 31.98±0.48 <sup>bc</sup> | 58.30±0.49 <sup>b</sup>  | 1.15±0.02 <sup>g</sup> | 8.57±0.02 <sup>f</sup>  | 31.98±0.48 <sup>bc</sup> | 59.45±0.50 <sup>a</sup>  | 100   |
| R5        | 5.98±0.13 <sup>bc</sup>    | 3.03±0.03 <sup>b</sup> | 31.55±0.65 <sup>c</sup>  | 58.22±0.80 <sup>b</sup>  | 1.22±0.01 <sup>f</sup> | 9.02±0.15 <sup>cd</sup> | 31.55±0.65 <sup>c</sup>  | 59.44±0.80 <sup>a</sup>  | 100   |
| R6        | 6.38±0.02 <sup>a</sup>     | 3.07±0.06 <sup>b</sup> | 30.36±0.17 <sup>d</sup>  | 59.37±0.26 <sup>a</sup>  | 0.81±0.01 <sup>h</sup> | 9.46±0.08 <sup>a</sup>  | 30.36±0.17 <sup>d</sup>  | 60.19±0.25 <sup>a</sup>  | 100   |
| R7        | 6.12±0.04 <sup>b</sup>     | 3.17±0.05 <sup>a</sup> | 31.17±0.33 <sup>bc</sup> | 57.12±0.37 <sup>d</sup>  | 1.42±0.02 <sup>d</sup> | 9.29±0.05 <sup>ab</sup> | 31.17±0.33 <sup>bc</sup> | 58.54±0.38 <sup>b</sup>  | 100   |

Values are expressed as mean ± SD (n = 3) of triplicate measurement. Superscripts with different letters are significantly different at  $p < 0.05$  within the same column. S2, soaked 2 hours; S12, soaked 12 hours; S24, soaked 24 hours; G24, germinated at 24 hours; G48, germinated at 48 hours; R5, roasted at 5 minutes; R6, roasted at 6 minutes; R7, roasted at 7 minutes.

**Table S3.** Fatty acids concentrations (mg/100g) of raw and processed black oil sunflower seeds.

| Fractions | Fatty acids concentrations (mg/100g) |                         |                          |                            |                         |                          |                          |                            | Total                      |
|-----------|--------------------------------------|-------------------------|--------------------------|----------------------------|-------------------------|--------------------------|--------------------------|----------------------------|----------------------------|
|           | 16:0                                 | 18:0                    | 18:1                     | 18:2                       | 18:3                    | ΣSFA                     | ΣMUFA                    | ΣPUFA                      |                            |
| Raw       | 52.78±0.32 <sup>f</sup>              | 26.60±0.33 <sup>h</sup> | 282.29±3.34 <sup>h</sup> | 491.00±2.35 <sup>f</sup>   | 15.21±0.48 <sup>e</sup> | 79.38±0.02 <sup>g</sup>  | 282.29±3.34 <sup>h</sup> | 506.21±2.76 <sup>f</sup>   | 867.89±1.07 <sup>h</sup>   |
| S2        | 111.42±1.27 <sup>b</sup>             | 55.42±0.27 <sup>c</sup> | 628.90±4.39 <sup>b</sup> | 1082.15±27.89 <sup>b</sup> | 24.66±0.24 <sup>b</sup> | 166.84±1.46 <sup>b</sup> | 628.90±4.39 <sup>b</sup> | 1106.81±27.72 <sup>b</sup> | 1902.55±30.83 <sup>b</sup> |
| S12       | 64.87±0.37 <sup>e</sup>              | 31.38±0.16 <sup>g</sup> | 351.83±2.35 <sup>g</sup> | 620.29±3.61 <sup>e</sup>   | 13.47±0.23 <sup>f</sup> | 96.25±0.49 <sup>f</sup>  | 351.83±2.35 <sup>g</sup> | 633.76±3.84 <sup>e</sup>   | 1081.84±4.77 <sup>g</sup>  |
| S24       | 28.65±0.77 <sup>g</sup>              | 13.58±0.07 <sup>i</sup> | 146.70±1.93 <sup>i</sup> | 248.65±0.97 <sup>g</sup>   | 7.25±0.09 <sup>h</sup>  | 42.23±0.82 <sup>h</sup>  | 146.70±1.93 <sup>i</sup> | 255.90±1.03 <sup>g</sup>   | 444.82±2.94 <sup>i</sup>   |
| G24       | 104.55±1.09 <sup>c</sup>             | 51.61±0.27 <sup>d</sup> | 568.60±8.30 <sup>d</sup> | 1036.88±17.86 <sup>c</sup> | 27.50±0.39 <sup>a</sup> | 156.15±0.94 <sup>c</sup> | 568.60±8.30 <sup>d</sup> | 1064.38±17.59 <sup>c</sup> | 1789.13±25.68 <sup>d</sup> |
| G48       | 120.41±1.44 <sup>a</sup>             | 59.60±0.46 <sup>a</sup> | 671.90±4.19 <sup>a</sup> | 1224.84±22.23 <sup>a</sup> | 24.17±0.47 <sup>b</sup> | 180.01±1.31 <sup>a</sup> | 671.90±4.19 <sup>a</sup> | 1249.00±22.57 <sup>a</sup> | 2100.92±20.67 <sup>a</sup> |
| R5        | 111.52±1.76 <sup>b</sup>             | 56.56±0.42 <sup>b</sup> | 588.10±8.64 <sup>c</sup> | 1085.44±21.22 <sup>b</sup> | 22.78±0.05 <sup>c</sup> | 168.08±1.82 <sup>b</sup> | 588.10±8.64 <sup>c</sup> | 1108.22±21.26 <sup>b</sup> | 1864.39±10.99 <sup>c</sup> |
| R6        | 88.75±0.73 <sup>d</sup>              | 42.73±0.47 <sup>g</sup> | 422.08±2.45 <sup>f</sup> | 825.60±13.00 <sup>d</sup>  | 11.28±0.08 <sup>g</sup> | 131.48±0.38 <sup>e</sup> | 422.08±2.45 <sup>f</sup> | 836.89±12.92 <sup>d</sup>  | 1390.45±15.71 <sup>f</sup> |
| R7        | 89.38±0.86 <sup>d</sup>              | 46.23±0.29 <sup>e</sup> | 469.45±2.37 <sup>e</sup> | 833.60±10.07 <sup>d</sup>  | 20.67±0.38 <sup>d</sup> | 135.61±0.52 <sup>d</sup> | 469.45±2.37 <sup>e</sup> | 854.27±10.37 <sup>d</sup>  | 1459.33±0.42 <sup>e</sup>  |

Values are expressed as mean  $\pm$  SD (n = 3) of triplicate measurement. Superscripts with different letters are significantly different at  $p < 0.05$  within the same column. S2, soaked 2 hours; S12, soaked 12 hours; S24, soaked 24 hours; G24, germinated at 24 hours; G48, germinated at 48 hours; R5, roasted at 5 minutes; R6, roasted at 6 minutes; R7, roasted at 7 minutes.
